# Supplementary material for: Engineering the intermediate band states in amorphous Ti3+-doped TiO2 for hybrid dye-sensitized solar cell applications
Source: Royal Society of Chemistry journal article supplement (doi:10.1039/c5ta00956a), 2015-01-01
Supplement: c5ta00956a1.pdf [file c5ta00956a1.pdf]

# Supplementary Information

## Engineering the Intermediate Band States in Amorphous Ti<sup>3+</sup>-doped Rutile TiO<sub>2</sub> for Hybrid Dye-sensitized Solar Cell Applications

Shusheng Pan<sup>1,2,†\*</sup>, Xiaolin Liu<sup>2,†</sup>, Min Guo<sup>2</sup>, Siu fung Yu<sup>2</sup>, Haitao Huang<sup>2</sup>,

Hongtao Fan<sup>3</sup>, Guanghai Li<sup>1\*</sup>

<sup>1</sup> Key Laboratory of Materials Physics, Anhui Key Laboratory of Nanomaterials and Nanostructures, Institute of Solid State Physics, Hefei Institutes of Physical Science, Chinese Academy of Sciences, Hefei 230031, People's Republic of China

<sup>2</sup> Department of Applied Physics, The Hong Kong Polytechnic University, Hung Hom, Kowloon, Hong Kong

<sup>3</sup> China National Academy of Nanotechnology and Engineering, Teda Tianjin300457, People's Republic of China

---

<sup>†</sup> These authors contributed equally to this work

\* corresponding authors: Prof. Li, [ghli@issp.ac.cn](mailto:ghli@issp.ac.cn), Dr. Pan, [sspan@issp.ac.cn](mailto:sspan@issp.ac.cn)

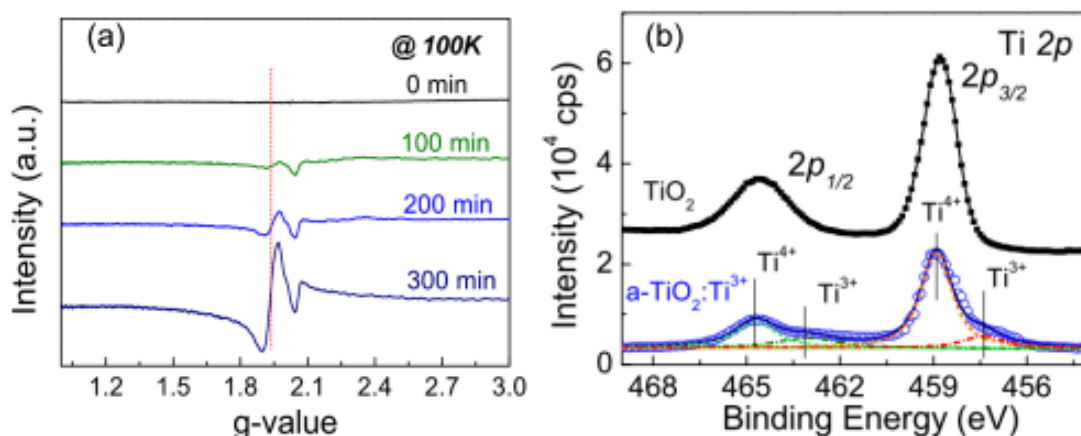

**Figure S1. EPR spectra at 100 K of rutile TiO<sub>2</sub> nanoparticles after laser irradiation for different time intervals; (b) Ti 2p X-ray photoelectron spectroscopy of rutile TiO<sub>2</sub> and a-TiO<sub>2</sub>:Ti<sup>3+</sup> nanoparticles, cps: count per second.**

There is a very strong EPR signal for the a-TiO<sub>2</sub>:Ti<sup>3+</sup> nanoparticles, while no signal is observed for crystalline TiO<sub>2</sub> nanoparticles. The intensity of the EPR signal increases with increasing laser irradiation time, indicating the increment of the Ti<sup>3+</sup> concentration. The *g*-factor can be assigned to originate from the surface and subsurface paramagnetic Ti<sup>3+</sup> centers, as has been previously investigated in Ti<sup>3+</sup>-doped TiO<sub>2</sub> grown by UV light irradiation.<sup>1,2</sup>

For the rutile TiO<sub>2</sub>, the binding energy peaks at 458.9 and 464.7 eV are assigned to the 2p<sub>3/2</sub> and 2p<sub>1/2</sub> core levels of Ti<sup>4+</sup>. The fitting of the Ti 2p<sub>1/2</sub> peak reveals the presence of two peak energies at 463.1 and 464.7 eV. The Ti 2p<sub>3/2</sub> peak can also be resolved into two Gaussian peaks with peak energy at 457.4 and 458.9 eV. The 2p<sub>3/2</sub> binding energy of 457.4 and 458.9 eV can be attributed to the Ti<sup>3+</sup> and Ti<sup>4+</sup>, respectively. The 2p<sub>1/2</sub> core level of 463.1 and 464.7 eV are related to the Ti<sup>3+</sup> and Ti<sup>4+</sup>, respectively. The fitted results were shown in Table S2. These peaks are well consistent with the recently reported binding energy value of TiO<sub>2</sub> nanostructures containing Ti<sup>3+</sup>.<sup>3-5</sup>

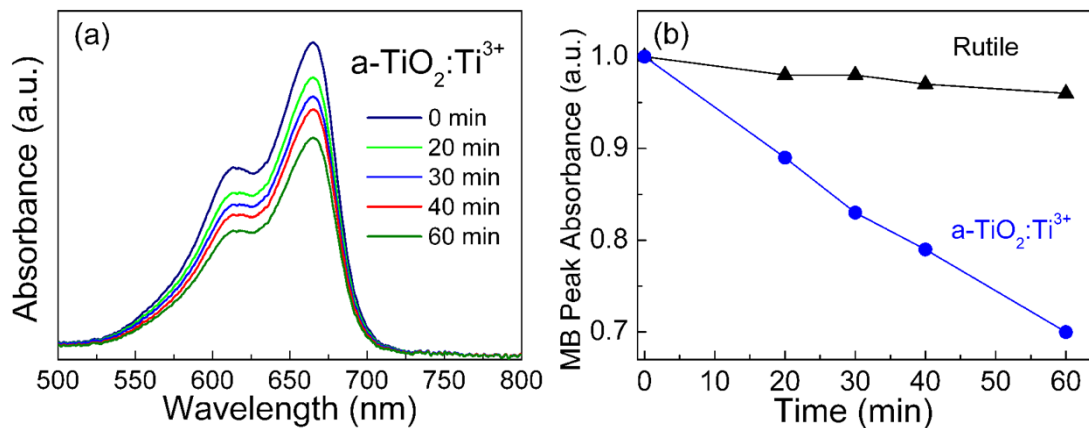

**Figure S2. (a) Absorption spectra of photocatalytically degraded methylene blue ( $6 \times 10^{-5}$  M) as a function of irradiation time in the presence of  $a\text{-TiO}_2\text{:Ti}^{3+}$  nanoparticles under Xe lamp (400 nm long pass filter) irradiation (b) Photodegradation kinetics of methylene blue using rutile nanoparticles (average size:  $\sim 35$  nm) and  $a\text{-TiO}_2\text{:Ti}^{3+}$  nanoparticles .**

In order to further understand the visible light response of  $a\text{-TiO}_2\text{:Ti}^{3+}$ , the photocatalysis property of  $a\text{-TiO}_2\text{:Ti}^{3+}$  was also investigated, as shown in Figure S2. The photodegradation of the methylene blue (MB) by rutile and  $a\text{-TiO}_2\text{:Ti}^{3+}$  nanoparticles were carried out under the irradiation of Xe lamp using 400 nm long pass filter for different time interval. As compared with rutile  $\text{TiO}_2$ , the  $a\text{-TiO}_2\text{:Ti}^{3+}$  nanoparticles exhibit unambiguous visible light photocatalysis property, as shown in Supplementary Fig. S2.

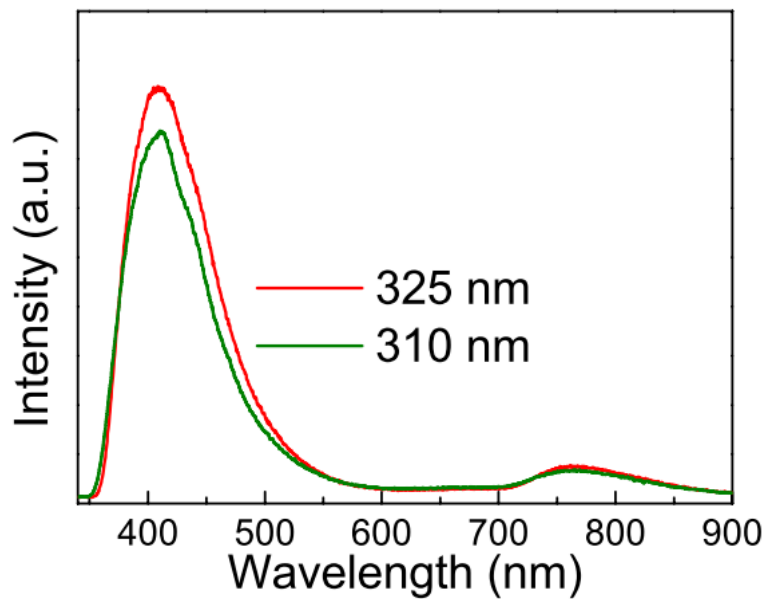

Figure S3. PL spectra of TiO<sub>2</sub>: Ti<sup>3+</sup> under different excitation wavelength

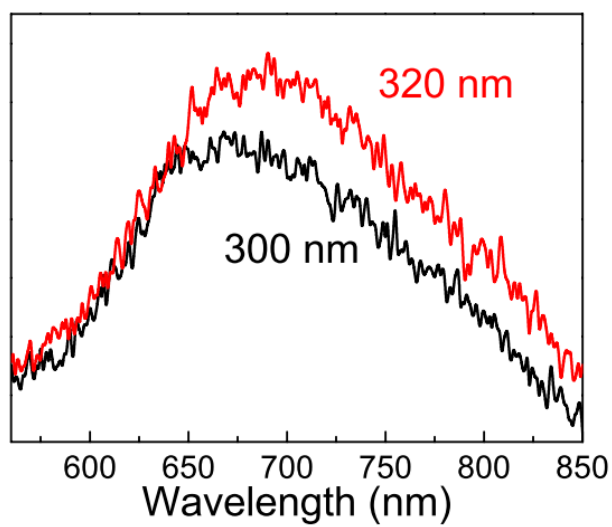

Figure S4. Defect emission spectra of pristine TiO<sub>2</sub> under different excitation wavelength (300 nm and 320 nm)

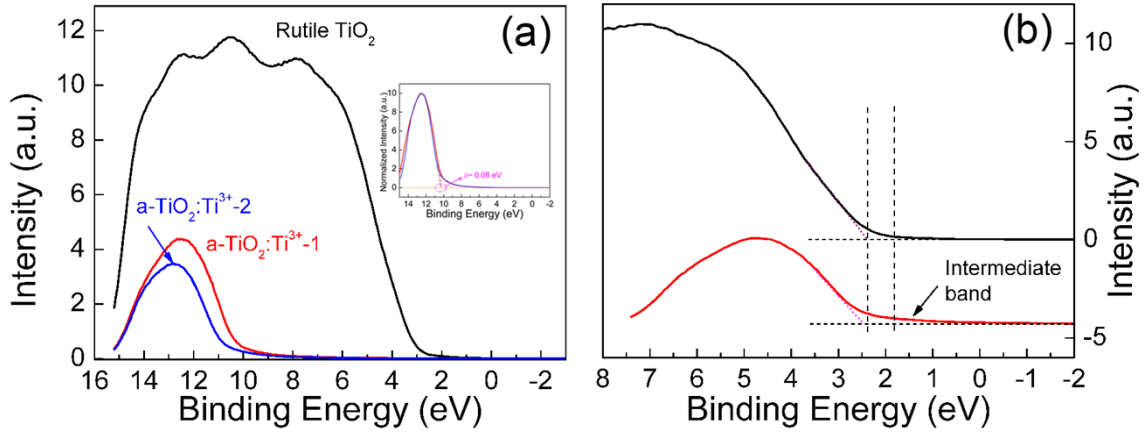

**Figure S5.** UPS results of rutile and a-TiO<sub>2</sub>:Ti<sup>3+</sup> (a) original data, inset, normalized UPS spectra of a-TiO<sub>2</sub>:Ti<sup>3+</sup>, the error is less than the energy resolution of UPS facility ( $\sim 0.1$  eV, ESCALAB 250, Thermo-VG Scientific), (b) Corrected UPS binding energy based on the XPS-VBS results.

In Figure S5, the a-TiO<sub>2</sub>:Ti<sup>3+</sup>-1 and a-TiO<sub>2</sub>:Ti<sup>3+</sup>-2 are the same sample, which is recorded for the first time and second times in UPS experiment. The divergence between a-TiO<sub>2</sub>:Ti<sup>3+</sup>-1 and a-TiO<sub>2</sub>:Ti<sup>3+</sup>-2 can be attributed to the influence of UV light-generated electrons, which may increase the Fermi level. The surface charging effect in UPS measurement can not be effectively inner-corrected. In XPS VBS measurement, the surface charging can be internally corrected by C 1s binding energy. As compared with the rutile, the long tail at low binding energy side (0~1.8 eV) in a-TiO<sub>2</sub>:Ti<sup>3+</sup> indicates the existence of intermediate band electronic states within the band gap.

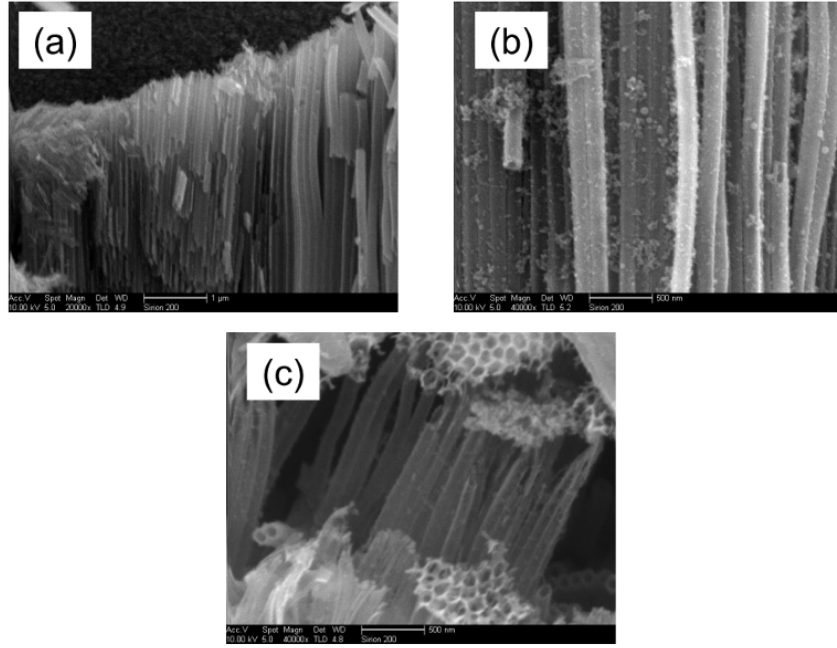

**Figure S6. SEM images of TiO<sub>2</sub> NTs arrays before after grafted by TiO<sub>2</sub>:Ti<sup>3+</sup> nanoparticles. (a) TiO<sub>2</sub> NTs, TiO<sub>2</sub> NTs soaking in TiO<sub>2</sub>:Ti<sup>3+</sup> solutions for 2 hours under irradiation of 365 nm UV lamp (b) and in darkness (c).**

The area coverage of a-TiO<sub>2</sub>:Ti<sup>3+</sup> is estimated from the FESEM image. The total amounts  $N_{\text{a-TiO}_2:\text{Ti}^{3+}}$  nanoparticles of a-TiO<sub>2</sub>:Ti<sup>3+</sup> nanoparticles can be counted. The average diameter of nanoparticles is 30 nm, the sectional area of one nanoparticle is  $3.14 \times 30 \times 30 = 2826 \text{ nm}^2$ , and the total area of nanoparticles is  $2826 N_{\text{a-TiO}_2:\text{Ti}^{3+}}$  nanoparticles  $\text{nm}^2$ . In the same SEM image with width  $W$  and length  $L$ , the area of packed nanotubes can be calculated  $W \cdot L \text{ nm}^2$ . Thus the area coverage of a-TiO<sub>2</sub>:Ti<sup>3+</sup> nanoparticles on TiO<sub>2</sub> nanotubes can be determined by the formula:  $2826 \cdot N_{\text{a-TiO}_2:\text{Ti}^{3+}}$  nanoparticles /  $W \cdot L$ .

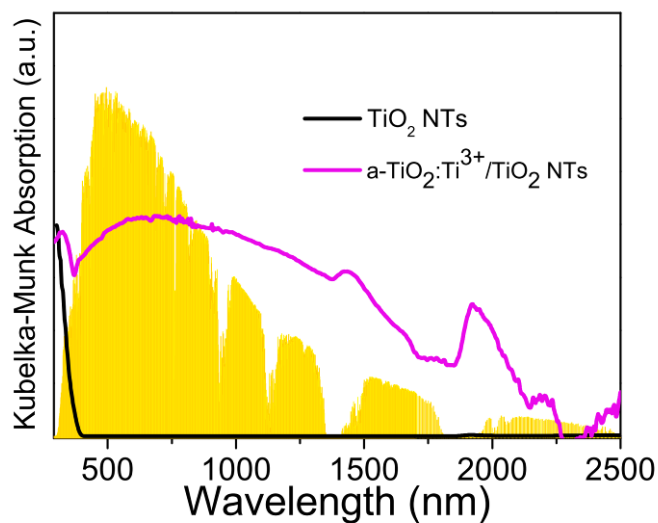

**Figure S7. Absorption spectra of TiO<sub>2</sub> nanotubes (TiO<sub>2</sub> NTs) and a-TiO<sub>2</sub>:Ti<sup>3+</sup>-grafted TiO<sub>2</sub> NTs. The AM1.5G solar spectrum is drawn as the background.**

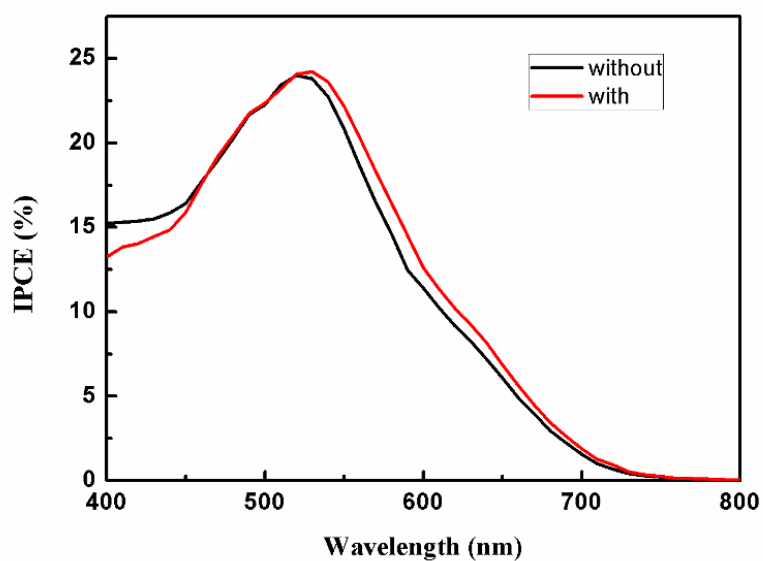

**Figure S8. Typical IPCE curves of TiO<sub>2</sub> NTs DSSCs with and without decorating the TiO<sub>2</sub>: Ti<sup>3+</sup> nanoparticles. The soaking time is 30 min.**

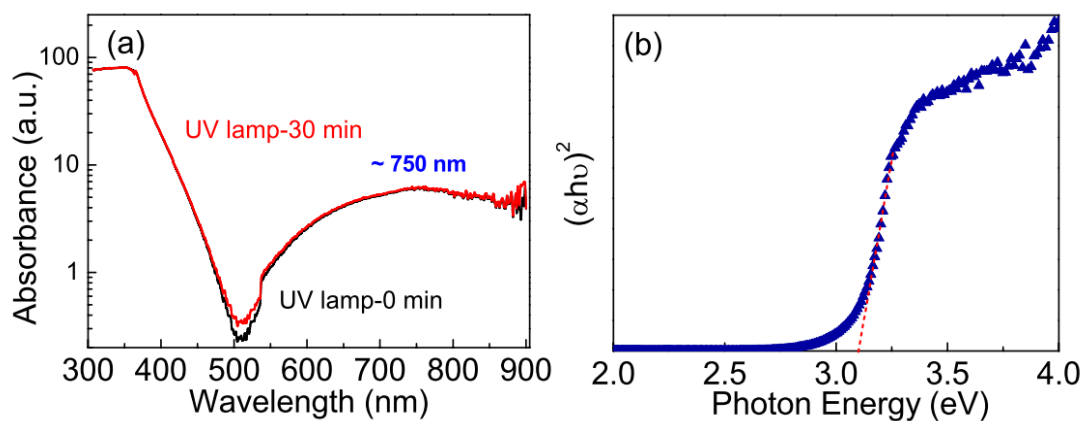

**Figure S9. (a) Typical absorption spectrum of a-TiO<sub>2</sub>:Ti<sup>3+</sup> colloidal solution, red line: absorbance of a-TiO<sub>2</sub>:Ti<sup>3+</sup> colloidal solution after 8 W 365 nm UV lamp irradiation.; (b) Tauc plot  $(\alpha h\nu)^2 \sim h\nu$  for the a-TiO<sub>2</sub>:Ti<sup>3+</sup> colloidal solution.**

The band gap calculated based on the absorption spectra of colloidal solution is 3.06 eV, which is well consistent with the value determined by the reflectivity spectrum (3.04 eV).



Table S1. Fitted PL decay parameters for rutile TiO<sub>2</sub> and a-TiO<sub>2</sub>: Ti<sup>3+</sup> samples

PL decay profiles were fitted by two exponential function equation:  $I(t) = t_0 + A_1 * \exp(-t/\tau_1) + A_2 * \exp(-t/\tau_2)$ .  $\tau_1$  and  $\tau_2$  denote the decay time for the faster and the slower components, and  $A_1$  and  $A_2$  are the PL amplitudes.

| Sample                                          | t <sub>0</sub> (ns) | $\tau_1$ (ns) | $\tau_2$ (ns) | A <sub>1</sub> | A <sub>2</sub> | R-Square |
|-------------------------------------------------|---------------------|---------------|---------------|----------------|----------------|----------|
| Rutile TiO <sub>2</sub> (at 410 nm)             | 25                  | 0.49          | 33            | 11205          | 146            | 0.993    |
| TiO <sub>2</sub> : Ti <sup>3+</sup> (at 410 nm) | 13                  | 0.49          | 26            | 9715           | 68             | 0.998    |
| TiO <sub>2</sub> : Ti <sup>3+</sup> (at 770 nm) | 80                  | 0.49          | 710           | 7700           | 1660           | 0.995    |

Table S2. XPS peaks fitted results of a-TiO<sub>2</sub>: Ti<sup>3+</sup> sample

| Peaks                    | Energy (eV) | FWHM (eV) | Area  |
|--------------------------|-------------|-----------|-------|
| 2p3/2(Ti <sup>4+</sup> ) | 458.9       | 1.176     | 31229 |
| 2p3/2(Ti <sup>3+</sup> ) | 457.4       | 1.627     | 4734  |
| 2p1/2(Ti <sup>4+</sup> ) | 464.7       | 1.588     | 10895 |
| 2p1/2(Ti <sup>3+</sup> ) | 463.2       | 2.351     | 2024  |

## **Proposed Formation Mechanism of Amorphous TiO<sub>2</sub> Grown by Pulsed Laser Ablation in Water**

In the fabrication process, only rutile TiO<sub>2</sub> and H<sub>2</sub>O were used as the precursor. The intermediate band state is related to the hydrogen impurity. According to the theoretical calculation [PRL 111, 065505 (2013)], the hydrogen acts as important role in forming the disordered TiO<sub>2</sub>. And the lattice disorder in TiO<sub>2</sub> is attributed to originate from the hydrogenation that helps to break up Ti-O bonds of rutile nanocrystals by forming Ti-H and O-H bonds. The H<sub>2</sub> possibly comes from the water photolysis by rutile TiO<sub>2</sub> (band gap: ~ 410 nm) under the irradiation of 355 nm UV laser. And the H<sub>2</sub> react with rutile TiO<sub>2</sub> to form disorder lattice under high temperature and high pressure at the local sites caused by the high power pulsed laser.

## References:

- 1 Pattier, B., Henderson, M., Poepl, A., Kassiba, A. and Gibaud, A. Multi-approach Electron Paramagnetic Resonance Investigations of UV-Photoinduced  $Ti^{3+}$  in Titanium Oxide-Based Gels. *J. Phys. Chem. B* **114**, 4424-4431 (2010).
- 2 Cottineau, T., Brohan, L., Pregelj, M., Cevc, P., Richard-Plouet, M. and Arçon, D. Evidence of Interfacial Charge Transfer upon UV-Light Irradiation in Novel Titanium Oxide Gel. *Adv. Funct. Mater.* **18**, 2602-2610 (2008).
- 3 Su, J., Zou, X.-X., Zou, Y.-C., Li, G.-D., Wang, P.-P. and Chen, J.-S. Porous Titania with Heavily Self-Doped  $Ti^{3+}$  for Specific Sensing of CO at Room Temperature. *Inorg. Chem.* **52**, 5924-5930 (2013).
- 4 Zhang, X. B., Tian, H. M., Wang, X. Y., Xue, G. G., Tian, Z. P., Zhang, J. Y., Yuan, S. K., Yu, T. and Zou, Z. G. The role of oxygen vacancy- $Ti^{3+}$  states on  $TiO_2$  nanotubes' surface in dye-sensitized solar cells. *Mater. Lett.* **100**, 51-53 (2013).
- 5 Cottineau, T., Rouet, A., Fernandez, V., Brohan, L. and Richard-Plouet, M. Intermediate band in the gap of photosensitive hybrid gel based on titanium oxide: role of coordinated ligands during photoreduction. *Journal of Materials Chemistry A* **2**, 11499-11508 (2014).
